# Supplementary material for: Phoenix dactyliferaL. seeds: a by-product as a source of bioactive compounds with antioxidant and enzyme inhibitory properties
Source: Royal Society of Chemistry journal article supplement (doi:10.1039/c9fo01125k), 2019-01-01
Supplement: c9fo01125k1.pdf [file c9fo01125k1.pdf]

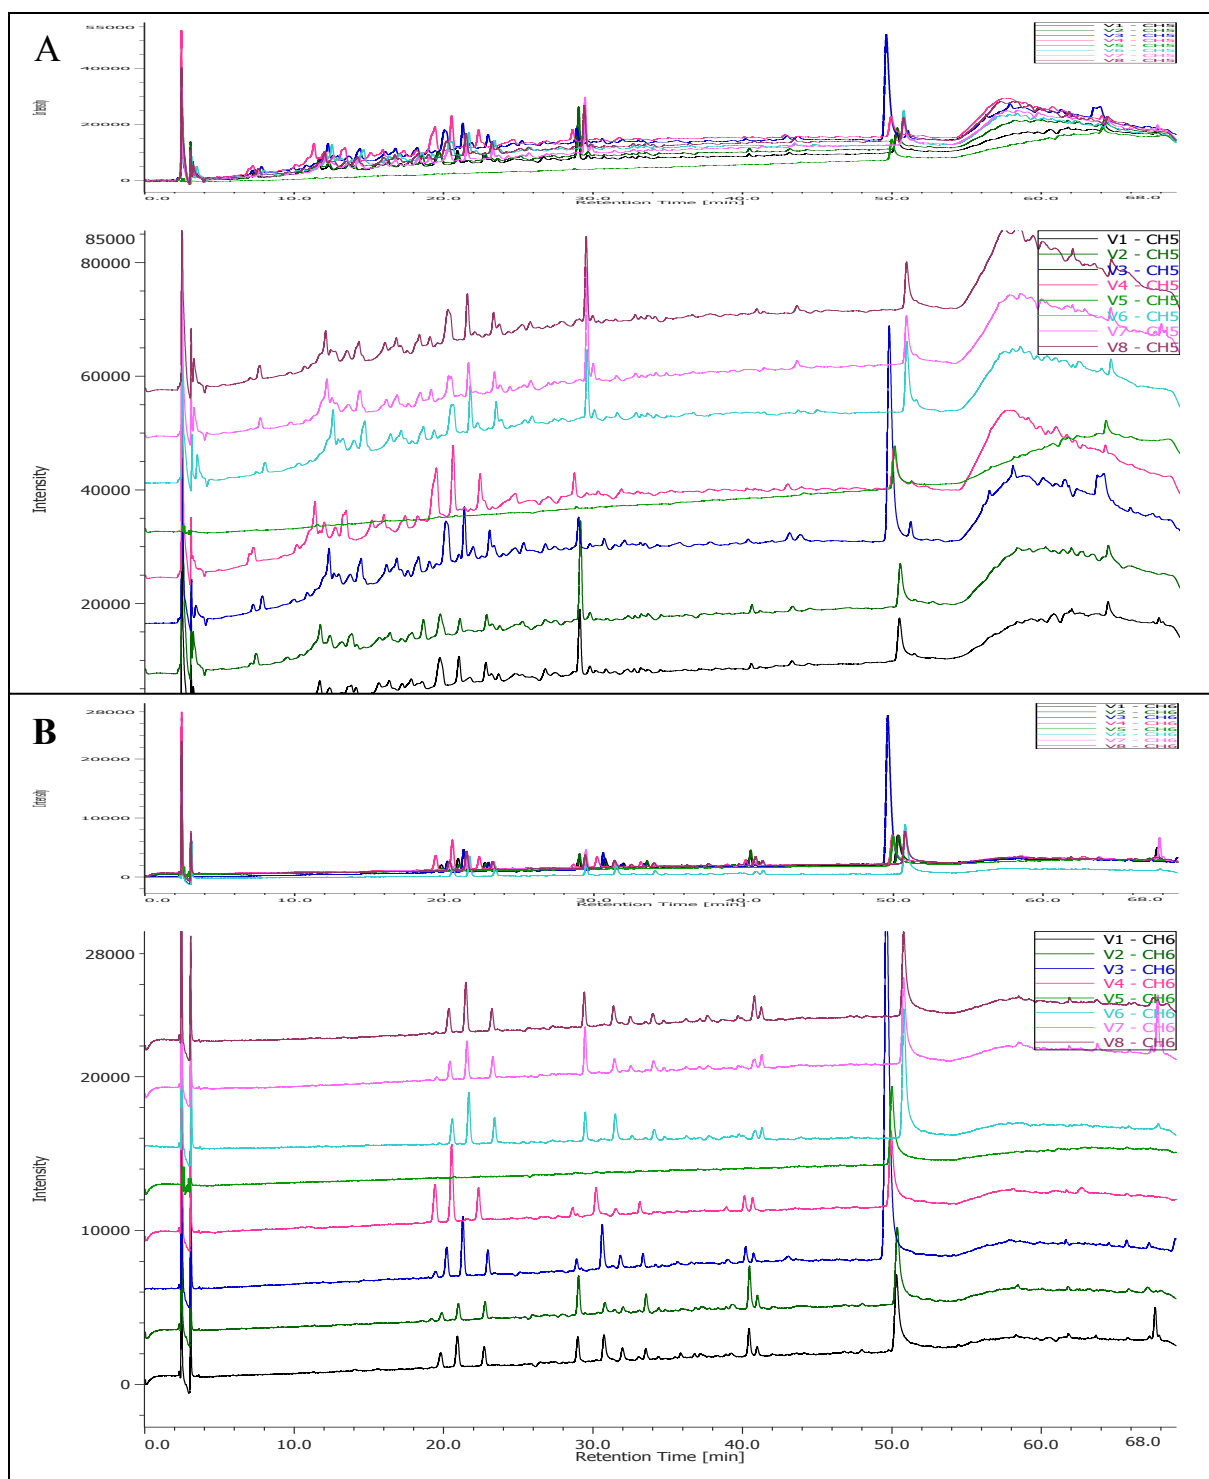

**Supplementary material.** HPLC-DAD-MS chromatograms (A) 280 nm and (B) 360 nm of phenolic acids and flavonoids composition of acetonic extracts from different seed cultivars of *Phoenix dactylifera* L.

V1: OUR; V2:TAZ; V3: TAR; V4: TAG; V5: OUC; V6: OUK; V7: DEL and V8: TWT
